# Supplementary material
Source: Springer Nature journal article supplement (https://www.springermedizin.de/resource/supplementary/12865_2008_228_MOESM1_ESM.pdf/9427680)

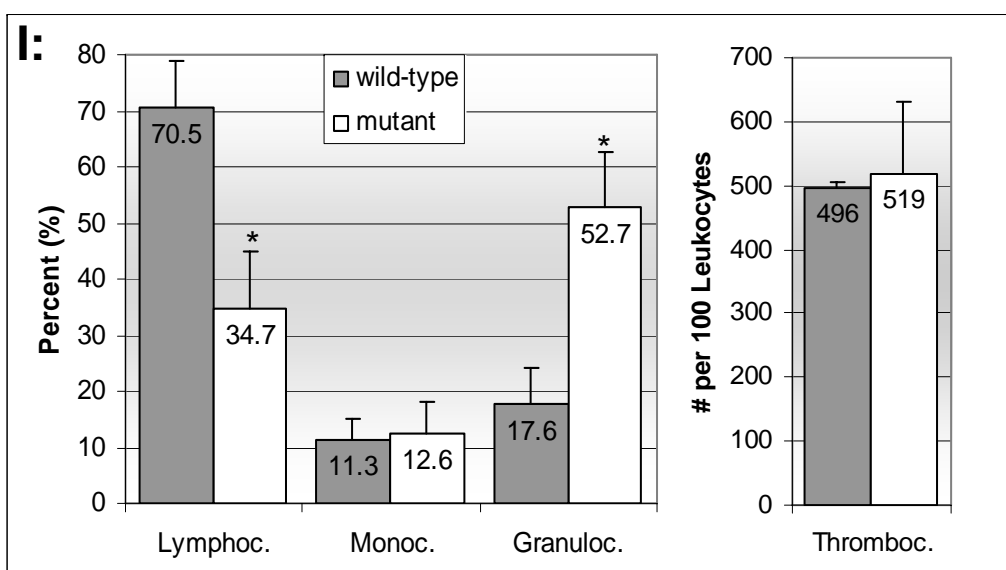

**III: *rag1*<sup>-/-</sup>**

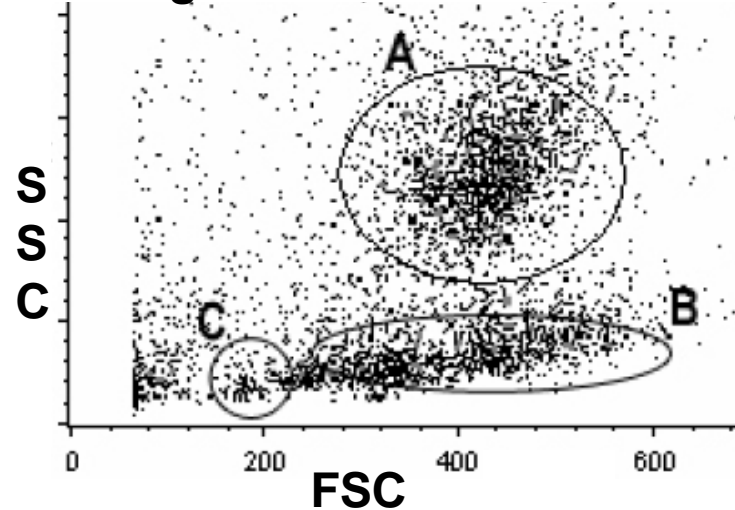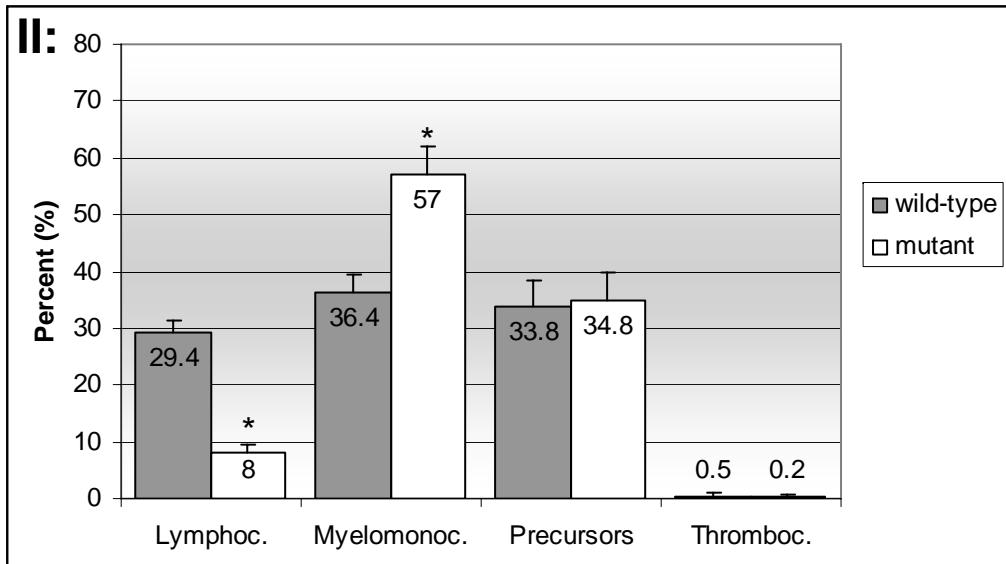

**IV: *rag1*<sup>+/+</sup>**

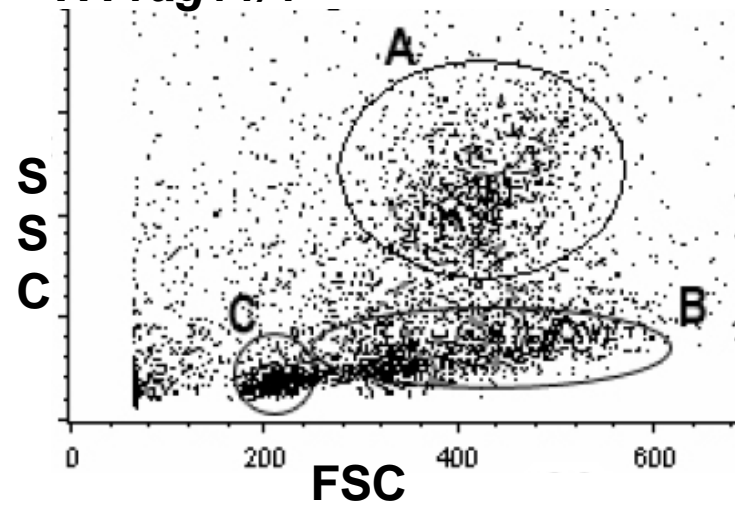

Supplement: MOESM1 [file 9427680]
